# Supplementary material for: A 3D flower-like Co/Ni bimetallic organic framework as an excellent material for electrochemical determination of quercetin
Source: Royal Society of Chemistry journal article supplement (doi:10.1039/d2nj06370k), 2023-01-01
Supplement: d2nj06370k1.pdf [file d2nj06370k1.pdf]

## Supporting information

### 3D flower-like Co/Ni bimetallic organic framework as excellent materials for electrochemical determination of quercetin

Shengbiao Zheng<sup>a,b</sup>, Tianna Liu<sup>a</sup>, Nini Zhang<sup>a</sup>, Liang Li<sup>a</sup>, Yanli Zhu<sup>a</sup>, Erhui Zhang<sup>a,b</sup>, Jing Tang<sup>a,b\*</sup>, Jiahao Guo<sup>a,b\*</sup>

a College of Chemistry and Material Engineering, Anhui Science and Technology University, 233030, Bengbu, Anhui Province, China

b Anhui Province Quartz Sand Purification and Photovoltaic Glass Engineering Research Center, 233030, Bengbu, Anhui Province, China

\*Corresponding author. Tel.: +86 552 3197361

E-mail address: [zhengtang102@163.com](mailto:zhengtang102@163.com) (Tang Jing), [guojiahao1974@163.com](mailto:guojiahao1974@163.com) (Guo Jiahao)

Complete postal address: College of Chemistry and Material Engineering, Anhui Science and Technology University, 1501 Huangshan Road, Bengbu, Anhui Province, 233030, China

The bare GCE was scanned in the above suspension at a scan rate of 100 mV s<sup>-1</sup> in the potential range between -1.6 V and 1.5 V using cyclic voltammetry (CV) obtain the CoNi-MOF/GCE. Cyclic voltammetry curves were shown in Fig S1, the voltammetric profile has redox peaks, verified that the material was attached to the electrode. It may be redox peaks of Ni<sup>2+</sup>/Ni<sup>3+</sup> and Co<sup>2+</sup>/Co<sup>3+</sup>. Moreover, the SEM images of the surface of bare GCE and CoNi-MOF/GCE was given in the Fig S2, At the bare GCE a uniform and smooth surface appeared (Fig. S2a). At the CoNi-MOF/GCE (Fig. S2b), the three-dimensional film appeared with increased roughness, indicating that CoNi-MOF was successfully modified on the electrode surface with increase of the effective area.

In addition, the SEM images of the surface of CoNi-MOF/GCE before (b) and after (c) detection of Qu was given in the Fig S2, 3D flower-like cluster also found at the modified electrode (Fig. S2c) after detection of Qu. And the EDX element of CoNi-MOF/GCE before (d) and after (e) detection of Qu was depicted in Fig. S2, the elements Co and Ni were detected in the CoNi-MOF/GCE before and after detection. Those results verified the stability for long-term usages of the CoNi-MOF/GCE.

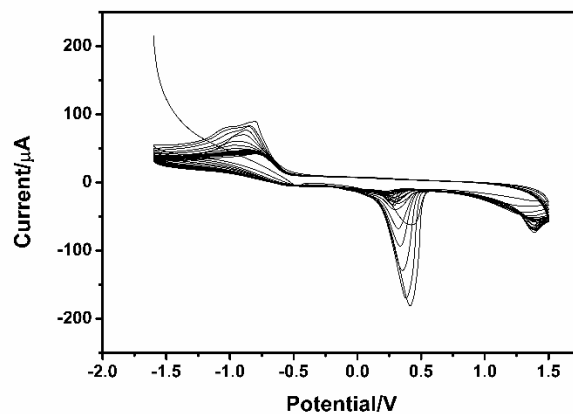

Fig. S1. Voltammetric profile of the CoNi-MOF containing  $0.1 \text{ mol L}^{-1} \text{ NaNO}_3$ ; 25 cycles between  $-1.6 \text{ V}$  and  $1.5 \text{ V}$  at  $50 \text{ mV s}^{-1}$ .

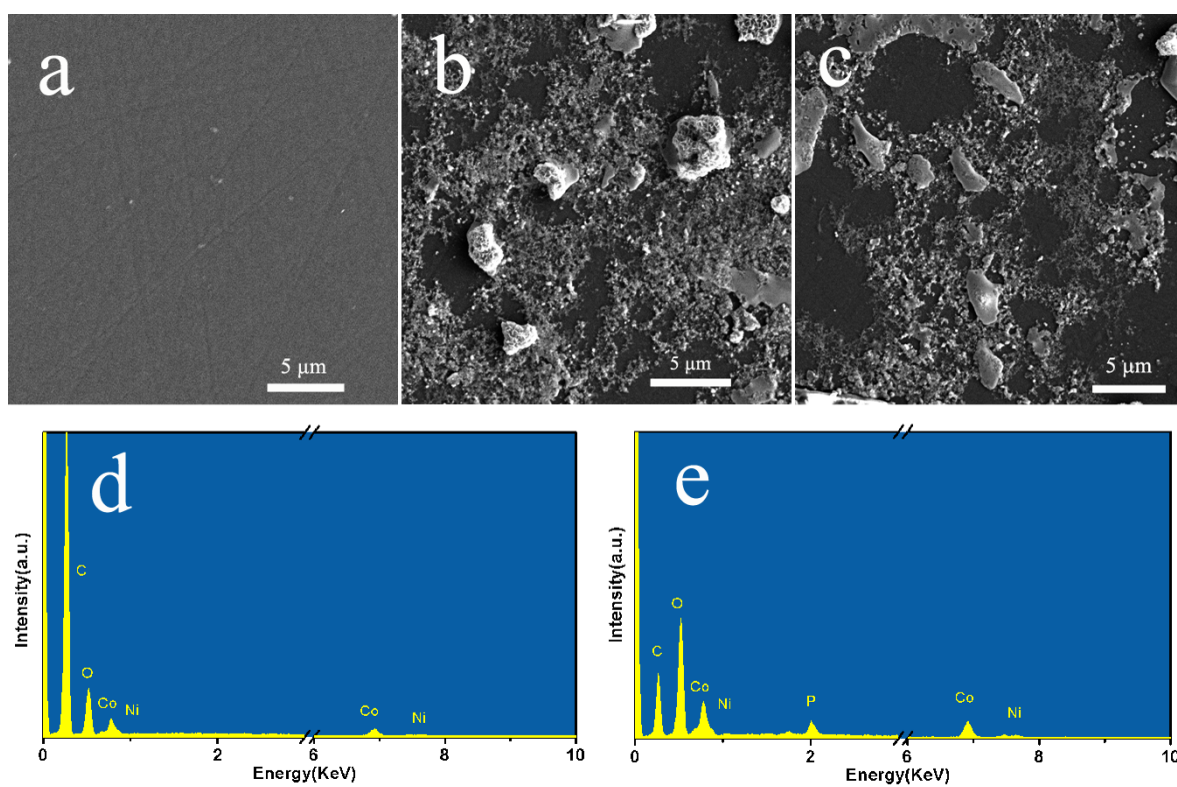

Fig. S2. SEM image of bare GCE (a), CoNi-MOF/GCE before (b) and after (c) detection of Qu, EDX element of CoNi-MOF/GCE before (d) and after (e) detection of Qu

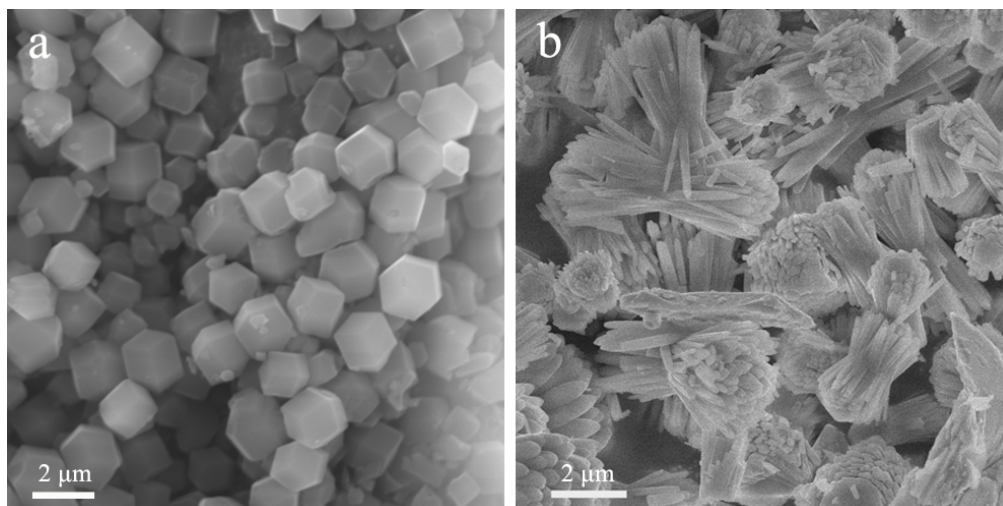

Fig.S3. SEM images of Co-MOF(a) and Ni-MOF (b)

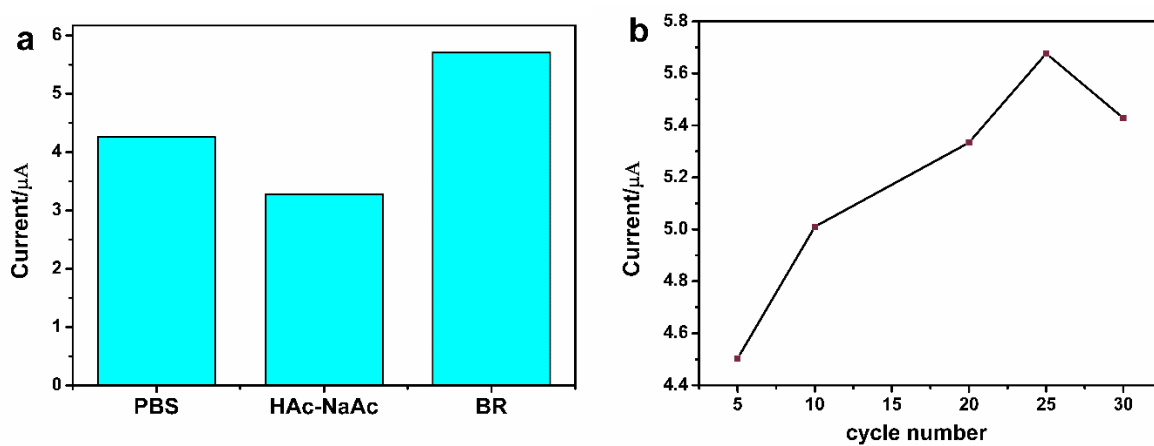

Fig. S4. (a) Oxidation peak currents of CoNi-MOF/GCE in the presence of 40 μM Qu in different buffer solution. (b) Plots of oxidation peak currents versus cycle numbers in the presence of 40 μM Qu.
